UPDATE

# Improvements to the Gulf Pipefish *Syngnathus scovelli* Genome

B Ramesh<sup>1,\*</sup>, CM Small<sup>2,3</sup>, H Healey<sup>2</sup>, B Johnson<sup>1</sup>, E Barker<sup>1</sup>, M Currey<sup>2</sup>, S Bassham<sup>2</sup>, M Myers<sup>1</sup>, WA Cresko<sup>2,3,†</sup> and AG Jones<sup>1,\*</sup>,<sup>†</sup>

<sup>1</sup>Department of Biological Sciences, University of Idaho, Moscow, ID, 83844 and <sup>2</sup>Institute of Ecology and Evolution, University of Oregon, Eugene, OR, 97403 and <sup>3</sup>Presidential Initiative in Data Science, University of Oregon, Eugene, OR, 97403

\*[ramesh@uidaho.edu](mailto:ramesh@uidaho.edu); [adamjones@uidaho.edu](mailto:adamjones@uidaho.edu)

<sup>†</sup>Contributed equally.

## Abstract

The Gulf pipefish *Syngnathus scovelli* has emerged as an important species in the study of sexual selection, development, and physiology, among other topics. The fish family Syngnathidae, which includes pipefishes, seahorses, and seadragons, has become an increasingly attractive target for comparative research in ecological and evolutionary genomics. These endeavors depend on having a high-quality genome assembly and annotation. However, the first version of the *S. scovelli* genome assembly was generated by short-read sequencing and annotated using a small set of RNA-sequence data, resulting in limited contiguity and a relatively poor annotation. Here, we present an improved genome assembly and an enhanced annotation, resulting in a new official gene set for *S. scovelli*. By using PacBio long-read high-fidelity (Hi-Fi) sequences and a proximity ligation (Hi-C) library, we fill small gaps and join the contigs to obtain 22 chromosome-level scaffolds. Compared to the previously published genome, the gaps in our novel genome assembly are smaller, the N75 is much larger (13.3 Mb), and this new genome is around 95% BUSCO complete. The precision of the gene models in the NCBI's eukaryotic annotation pipeline was enhanced by using a large body of RNA-Seq reads from different tissue types, leading to the discovery of 28,162 genes, of which 8,061 were non-coding genes. This new genome assembly and the annotation are tagged as a RefSeq genome by NCBI and thus provide substantially enhanced genomic resources for future research involving *S. scovelli*.

**Classifications:** Genome; Genome Assembly; Whole Genome Sequencing; Fish Genome; Gulf Pipefish; *Syngnathus scovelli*;

## Data Description

This article presents a resource (genome assembly) that marks a technological improvement compared to the one previously published in the article, "The genome of the Gulf pipefish enables understanding of evolutionary innovations." [1].

*De novo* genome assembly is evaluated based on three primary criteria: accuracy or correctness, completeness, and contiguity [2, 3]. Typically, the correctness of a genome is one of the most challenging features to measure. However, with modern, long-read sequencing technologies, the orientation of the contigs and the gene order of an assembly are highly accurate [4, 5, 6]. On the other hand, completeness and contiguity are easier to measure [6, 7, 8] yet more challenging to achieve, especially in non-model organisms. The Gulf pipefish (*Syngnathus scovelli*) genome is an essential resource for the study of comparative genomics, evolutionary developmental biology, and

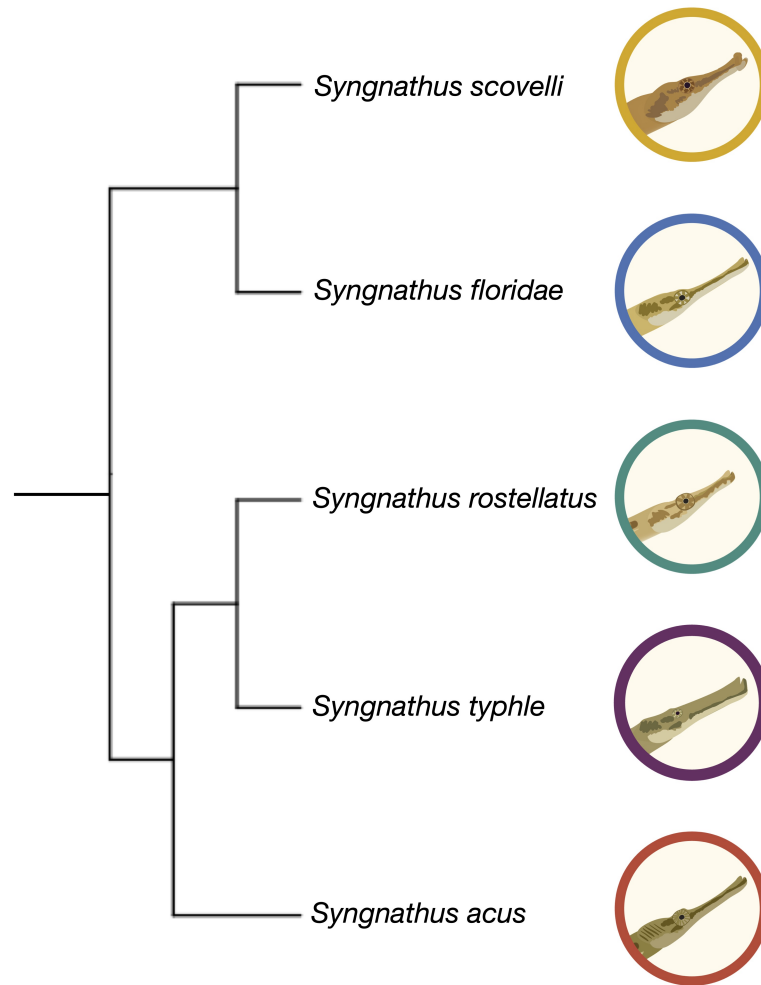

Figure 1. Cladogram of the five *Syngnathus* species in this study. This phylogeny is based on the Ultra Conserved Elements among all syngnathids [16].

other related topics [1, 9, 10, 11, 12, 13, 14, 15]. Given the technological constraints when it was initially sequenced, the first version of the *S. scovelli* genome is highly accurate and mostly complete, but it leaves considerable room for improvement with respect to contiguity [1]. Here, with the use of third-generation sequencing technology, including PacBio High Fidelity (Hi-Fi) long reads from circular consensus sequences (CCS) and Hi-C proximity ligation from Phase Genomics, we produce a nearly complete chromosome-scale genome assembly that not only improves on completeness and accuracy but is also the most contiguous genome yet produced for the genus *Syngnathus* (Table 1).

## Context

Evolutionary novelties are widespread across the tree of life. However, the origin of *de novo* genes and their associated regulatory networks, as well as their effects on the phenotype, remain mysterious in most species. Syngnathidae is a family of teleost fishes that includes pipefishes, seahorses, and seadragons [1, 12, 13, 14, 15, 17]. Syngnathid fishes are known for their evolutionary novelty with respect to morphology and physiology. For instance, species in this family have variously evolved elaborate leafy appendages, male brooding structures, prehensile tails, elongated facial bones, and numerous other unusual traits [1, 12, 13, 14]. With a variety of mating systems and sex roles [12, 13, 14, 15, 17], the syngnathid fishes also provide an excellent study system to investigate the generality of theories on sexual selection and reproductive biology [15, 17]. Advances in comparative genomics and the evolutionary developmental biology of novel traits in syngnathids will require the development of additional genomic tools. Among these are well-assembled and annotated genomes [1]. Here, we take a step in this direction by producing an improved reference genome for the Gulf pipefish.

## Methods

### DNA and RNA extraction

We collected *S. scovelli* from the Gulf of Mexico in Florida, USA (Tampa Bay), and flash froze them in liquid nitrogen. We pulverized approximately 50 mg of whole-body tissue (posterior to the urogenital opening) from a single male on liquid nitrogen, which we submitted to the University of Oregon Genomics and Cell Characterization Core Facility (UOGC3F) for high-molecular-weight DNA isolation using the PacBio Nanobind tissue kit. We submitted similar (but unpulverized) frozen tissue from the same individual fish to Phase Genomics to

generate a Hi-C library using Proximo Animal (v4) technology.

In addition, we used organic extraction with TRIzol Reagent, followed by column-based binding and purification using the Qiagen RNeasy MinElute Cleanup Kit to extract mRNA from the Brain, Eye, Gills, Muscle/Skin, Testis, Ovary, Broodpouch, and Flap tissues.

## Sequencing and Assembly

After the size selection of genomic DNA using the Blue Pippin (11 kb cutoff), the UOGC3F constructed a sequencing library using the SMRTbell Express Template Prep Kit 2.0. One SMRT cell was sequenced by the UOGC3F using PacBio Sequel II technology, yielding 33.39 Gb in 2.05M CCS reads (out of 6.298M Hi-Fi reads in total). We sequenced 70.4 Gb of paired-end 150 nt reads (234.6 million in total) from the Hi-C library using an Illumina NovaSeq 6000 at the UOGC3F. The RNA sequencing libraries were prepared using KAPA mRNA HyperPrep Kit. We sequenced 159 bp paired-end reads using Illumina Novaseq 6000 for each tissue from the RNA sequencing libraries for annotation.

Using the Hi-Fi sequences, we estimated the genome size using genomescope2 (v2.0) [18] and meryl (v2.2) [19] with a default k-mer size of 21. The paired-end Hi-C reads were trimmed using trimmomatic (v0.39) [20] with the parameter HEADCROP:1 to remove the first base, which was of low quality. Together with the Hi-Fi sequences, we assembled the first-pass genome assembly in Hi-C integrated mode using hifiasm (v0.16.1) [19] with default parameters. The First-Pass assembly refers to the first draft consensus assembly from the Hi-Fi and Hi-C data. We extracted the consensus genome from hifiasm in fasta format and assembled the contigs into scaffolds using juicer (v1.6) [21]. We used the 3D-DNA (version date: Dec 7, 2016) [22] pipeline to merely order the scaffolds. The Hi-C contact map of the ordered scaffolds was visualized using juicebox (v1.9.8) with no breaking of the original contigs.

## Assessment of completeness and contiguity

To compare the completeness and contiguity of the latest version of the *S. scovelli* genome against the other *Syngnathus* genomes (Figure 1), we downloaded the genome assemblies of *S. acus* (GCA\_024217435.2), *S. rostellatus* (GCA\_901007895.1) [23], *S. typhle* (GCA\_901007915.1) [23], and *S. floridae* (GCA\_010014945.1) from NCBI. We used Benchmarking Universal Single-Copy Orthologs (BUSCO v5.2.2) [24] in genome mode with the actinopterygii\_odb10 database (as of 2021-02-19) to evaluate the completeness of the genome. Also, we used a k-mer-based assessment using Merqury (v2020-01-29, [25]) to estimate the completeness and the base error rate. We then used the Quality Assessment Tool (QUAST v5.0.2) [26] to estimate Nx and Lx statistics for our assembly.

## Annotation using the NCBI Eukaryotic Annotation Pipeline

The NCBI Eukaryotic Genome Annotation Pipeline (v10.0) is an automated software pipeline identifying coding and non-coding genes, transcripts, and proteins on complete and incomplete genome submissions to NCBI. The core components of this pipeline are the RNA alignment program (STAR and Splign) and Gnomon, a gene prediction program. In this pipeline, the RNA-Seq reads from the various (Brain, Eye, Gills, Muscle/Skin, Testis, Ovary, Broodpouch, and Flap) tissues of multiple samples, including the *S.scovelli* individual used for Hi-Fi and Hi-C sequence data (SRR20438584 - SRR20438604) were aligned to the genome. Gnomon combines the information from alignments of the transcripts and the *ab initio* models from an HMM-based algorithm to create a RefSeq annotation. This RefSeq annotation produces a non-redundant set of a predicted transcriptome and a proteome that can be used for various analyses. The Eukaryotic annotation pipeline is not publicly available; thus, we requested the staff at NCBI to annotate the *S.scovelli* genome.

## Data Validation and Quality Control

### Assembly Statistics

With approximately 2 million Hi-Fi reads and 234.6 million Hi-C reads, we generated the first pass consensus assembly with 585 contigs. The N50 and L50 for this assembly were 15.5Mb and 11, respectively. We scaffolded this assembly to correct misassemblies and produced a final assembly containing 526 contigs with N50 and L50 values of 17.3 Mb and 10, respectively (Table 1). This improved version of the *S. scovelli* genome has around three times a lower number of contigs compared to the original *S. scovelli* genome. The NG50 and NG75 are ~1.75x and ~2x larger, respectively, than the previous assembly, implying less fragmentation. This new assembly reduces the number of gaps per 100 kilobase pairs (kb) from 6837.20 Ns per 100 kb to a mere 0.27 Ns per 100 kbp, owing to the increased contiguity. This new *S. scovelli* genome is on par with the current best genome in the *Syngnathus* genus, that of *S. acus*, which is a complete chromosome-scale assembly. The first 22 scaffolds of the *S. scovelli* genome are of chromosome-scale in line with the genetic map [1] and the karyotype data [27] with a total length of around 380Mb (Figure 3), comparable to the estimated genome size of 380 Mb (see supplementary details; Supplementary Table 1 and Figure 1). In addition, 88.94% of the total assembly length is captured in the 22 chromosome-scale scaffolds. For 15 of the chromosome-scale scaffolds, a single contig made up the total length; the remaining seven were generally composed of a small number of contigs (Figure 3).

### BUSCO and Merqury Results

BUSCO results suggest a high degree of completeness as it finds 95% of the orthologs in the actinopterygii dataset (94.7%[S : 93.9%, D : 0.8%], F : 1.5%, M : 3.8%, n : 3640) when run in genome mode (Figure 2) and the Merqury evaluation suggests that the genome is ~86% complete with a QV value of 61.37 and an error rate of  $7.3e^{-05}\%$  (see supplementary for more details; Supplementary Table S2 and S3).

Consistent with the BUSCO contiguity metrics, the genome is on par with *S. acus* for completeness, which is also around 95% complete. Missing genes make up the majority of the remaining 5% of genes. We identify genes likely to be truly missing from the *S. scovelli* genome

**Table 1.** Contiguity metrics from QUAST for various *Syngnathus* species is summarized.

| Metrics           | <i>S.acus</i> | <i>S.rostellatus</i> | <i>S.typhle</i> | <i>S.floridae</i> | <i>S.scovelli_v1</i> | <i>S.scovelli_v2</i> |
|-------------------|---------------|----------------------|-----------------|-------------------|----------------------|----------------------|
| Number of contigs | 87            | 8935                 | 526             | 6895              | 886                  | 526                  |
| Largest contig    | 28,444,102    | 856,273              | 9,665,359       | 61,807,209        | 23,505,159           | 30,098,933           |
| Total length      | 324,331,233   | 280,208,023          | 313,958,489     | 303,298,972       | 305,995,683          | 431,750,762          |
| Reference length  | 324,331,233   | 324,331,233          | 324,331,233     | 324,331,233       | 324,331,233          | 324,331,233          |
| GC (%)            | 43.46         | 43.08                | 43.29           | 43.63             | 42.95                | 45.00                |
| Reference GC (%)  | 43.46         | 43.46                | 43.46           | 43.46             | 43.46                | 43.46                |
| N50               | 14,974,571    | 88,962               | 3,046,963       | 7,845,045         | 12,400,093           | 17,337,441           |
| NG50              | 14,974,571    | 70,018               | 3,012,268       | 7,783,711         | 11,493,655           | 20,118,474           |
| N75               | 11,896,884    | 34,357               | 1,098,273       | 21,150            | 8,458,319            | 13,347,818           |
| NG75              | 11,896,884    | 15,229               | 998,421         | 17,023            | 7,908,134            | 15,901,424           |
| L50               | 8             | 812                  | 30              | 5                 | 10                   | 10                   |
| LG50              | 8             | 1,092                | 32              | 6                 | 11                   | 7                    |
| L75               | 14            | 2,068                | 72              | 1,160             | 17                   | 17                   |
| LG75              | 14            | 3,492                | 79              | 2,003             | 19                   | 12                   |

For NGx and LGx calculations, *S.acus* was used as the reference species. All the *Syngnathus* genomes (except *S.scovelli*) were last accessed from NCBI on 2022-July-26.

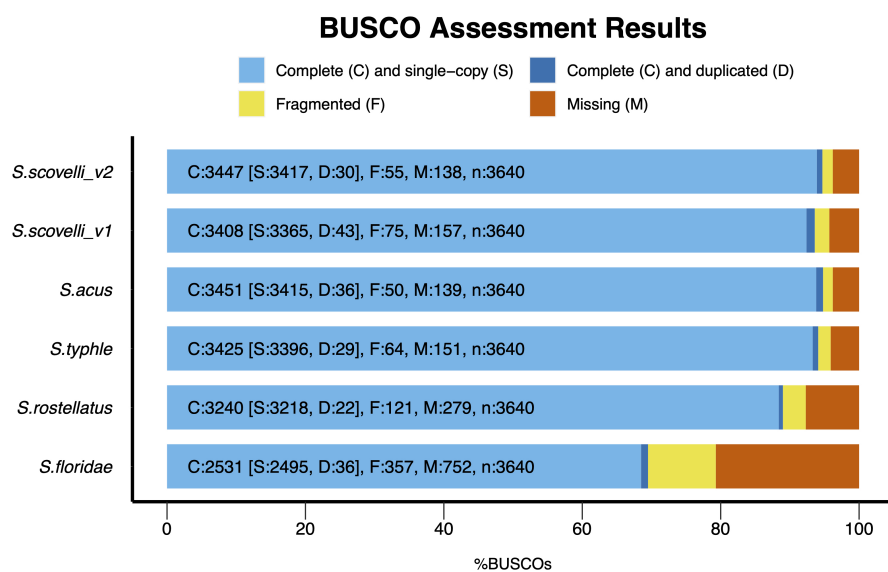

**Figure 2.** Comparison of BUSCO completeness among all the five *Syngnathus* species.

and more broadly among members of Syngnathidae (including the seahorses, genus *Hippocampus* along with *Syngnathus*) by confirming their absence across BUSCO results from the present assembly, four additional members of the genus *Syngnathus*, and six additional *Hippocampus* publicly available assemblies (see supplementary for additional details; Supplementary Table 6). Of the missing BUSCO genes, 83 genes are shared among all the species of *Syngnathus*, and 38 genes are missing from both genera (see supplementary for additional details; Supplementary Table 6). Future work could profitably explore these missing genes, as some may be related to the interesting novel traits in syngnathid fishes.

## Annotation Results

After masking about 43% of the genome, the annotations resulted in the prediction of about 28,162 genes, of which 8,061 were non-coding genes (see supplementary details; Supplementary Table 4 and Table 5). The 28,162 genes produce about 59,938 transcripts, of which 47,846 are mRNA, and the rest is made up of other types of RNAs such as tRNA, lncRNA, and others. Out of 20,101 coding genes, 18,616 genes had a protein with an alignment covering 50% or more of the query against the UniProtKB curated protein set, and 9152 had an alignment covering 95% or more of the query.

## Reuse Potential

The new version of the *S.scovelli* genome opens the doors for more accurate results by enhancing comparative genome data analysis and facilitating the creation of robust tools for molecular genetic studies. We generated the original version of the genome to focus on genetic mechanisms underlying the unique body plan among pipefishes and seahorses. This genome version takes us one step closer to uncovering these evolutionary mysteries and aids in answering other unknown features, such as the effects of sexual selection and mate choice systems on genome evolution.



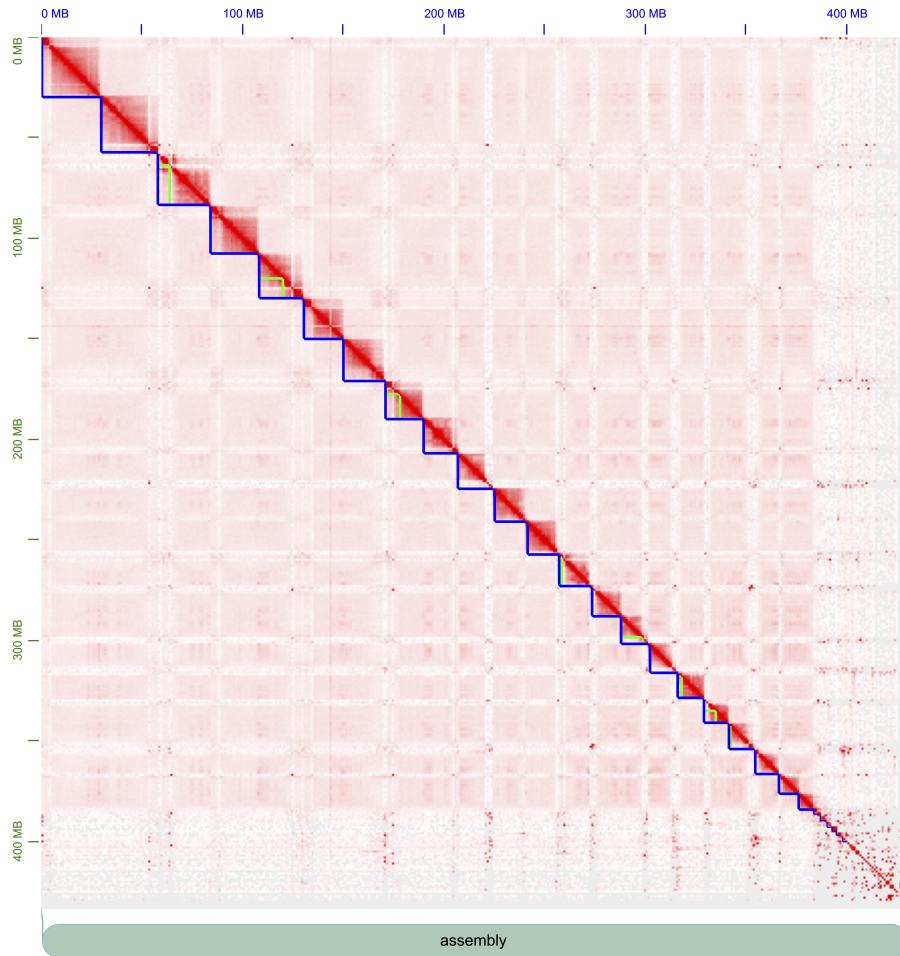

**Figure 3.** Visualization of contact maps from Hi-C reads for *Syngnathus scovelli*(v2). The first 22 primary assembly features (blue lines) sum to about 380Mb in size, which is the estimated genome size for the species. Green lines reflect individual contigs from the hifiasm assembly that were organized into chromosome-level scaffolds based on Hi-C contact data.

## Data Availability

The genome is available on NCBI with the assembly accession number GCA\_024217435.2. The genome is annotated via the NCBI eukaryotic genome annotation pipeline, and the annotation report release (100) is available [here](#). Several smaller contigs and contaminant microbes were removed in the annotation pipeline yielding a more robust genome assembly. The sequence identifier for the chromosome-level scaffolds is available in the supplementary materials (see supplementary details; Supplementary Table 7). The NCBI Bioproject accession number is [PRJNA851781](#), the raw Hi-Fi sequence accession is SRR19820733, the Hi-C sequence accession is SRR22219025, and for RNA-Seq sequence files from various tissues are SRR20438584 – SRR20438604.

## Declarations

### List of abbreviations

Mb: Mega basepair; Gb: Giga basepair; RNA: Ribo Nucleic Acid; DNA: Deoxyribo Nucleic Acid; BUSCO: Benchmarking Universal Single-Copy Orthologs; QAST: Quality Assessment Tool; CCS: Circular Consensus Sequence; Hi-Fi: High-Fidelity; SMRT: Single Molecule Real Time; NCBI: National Center for Biotechnology Information.

### Ethical Approval (optional)

Not applicable

### Consent for publication

Not applicable

### Competing Interests

The authors declare that they have no competing interests.

### Funding

This work was funded by National Science Foundation (NSF) [Grant 2015419](#) to WA Cresko and AG Jones and [Grant 1953170](#) to AG Jones. We also acknowledge the startup funds provided by the University of Idaho to AG Jones.

### Author's Contributions

The corresponding authors are [Balan Ramesh](#) and [Adam Jones](#). Author contributions, described using the CASRAI CREDIT typology (<http://casrai.org/credit>), are as follows:

Conceptualization: BR, CMS, SB, WAC, AGJ; Methodology: BR, CMS, SB, BDJ, EB; Software: BR, CMS, HH, MC; Validation: BR, CMS; Formal Analysis: BR, CMS; Investigation: BR, CMS; Resources: MC, BDJ, EB, MM; Data Curation: BR, CMS, MC; Writing – Original Draft Preparation: BR, CMS, AGJ; Writing – Review & Editing: BR, CMS, AGJ; Visualization: BR, CMS; Supervision: WAC, AGJ; Project Administration: CMS, SB, WAC, AGJ; Funding Acquisition: WAC, AGJ;

### Acknowledgements

We are truly grateful for the dedicated efforts of Emily Rose and her students at Valdosta State University, who collected the *S.scovelli* samples crucial for this work (Florida Fish and Wildlife Conservation Commission Permit: SAL-17-0182-E, SAL-18-0182-E). We also thank Jeff Bishop and Tina Arredondo from the University of Oregon (UO) GC3F for library preparation and sequencing assistance. We want to acknowledge the staff at Phase Genomics for their helpful Hi-C technical support. We are grateful to Mike Coleman and Mark Allen for assisting with Talapas Supercomputer Cluster at UO and Benji Oswald with Research Computing and Data Services at UI. We greatly appreciate the support of the NCBI staff for the Eukaryotic Annotation Pipeline. We thank [Jacelyn Shu](#) for her pipefish illustrations. We are grateful for the helpful comments and review by Sven Winter and Yue Song on the manuscript.

### References

1. Small C, Bassham S, Catchen J, Amores A, Fuiten A, Brown R, et al. The genome of the Gulf pipefish enables understanding of evolutionary innovations. *Genome biology* 2016;17(1):1–23.
2. Alhakami H, Mirebrahim H, Lonardi S. A comparative evaluation of genome assembly reconciliation tools. *Genome biology* 2017;18(1):1–14.
3. Dida F, Yi G. Empirical evaluation of methods for de novo genome assembly. *PeerJ Computer Science* 2021;7:e636.
4. Fox EJ, Reid-Bayliss KS, Emond MJ, Loeb LA. Accuracy of next generation sequencing platforms. *Next generation, sequencing & applications* 2014;1.
5. Hu T, Chitnis N, Monos D, Dinh A. Next-generation sequencing technologies: An overview. *Human Immunology* 2021;82(11):801–811.

6. Sohn Ji, Nam JW. The present and future of de novo whole-genome assembly. *Briefings in bioinformatics* 2018;19(1):23–40.
7. Ekblom R, Wolf JB. A field guide to whole-genome sequencing, assembly and annotation. *Evolutionary applications* 2014;7(9):1026–1042.
8. Wajid B, Serpedin E. Do it yourself guide to genome assembly. *Briefings in functional genomics* 2016;15(1):1–9.
9. Jones A, Avise J. Microsatellite analysis of maternity and the mating system in the Gulf pipefish *Syngnathus scovelli*, a species with male pregnancy and sex-role reversal. *Molecular ecology* 1997;6(3):203–213.
10. Ratterman NL, Rosenthal GG, Jones AG. Sex recognition via chemical cues in the sex-role-reversed gulf pipefish (*Syngnathus scovelli*). *Ethology* 2009;115(4):339–346.
11. Begovac PC, Wallace RA. Stages of oocyte development in the pipefish, *Syngnathus scovelli*. *Journal of Morphology* 1988;197(3):353–369.
12. Paczolt KA, Jones AG. Post-copulatory sexual selection and sexual conflict in the evolution of male pregnancy. *Nature* 2010;464(7287):401–404.
13. Haase D, Roth O, Kalbe M, Schmiedeskamp G, Scharsack JP, Rosenstiel P, et al. Absence of major histocompatibility complex class II mediated immunity in pipefish, *Syngnathus typhle*: evidence from deep transcriptome sequencing. *Biology letters* 2013;9(2):20130044.
14. Mobley KB, Small C, Jones A. The genetics and genomics of Syngnathidae: pipefishes, seahorses and seadragons. *Journal of fish biology* 2011;78(6):1624–1646.
15. Whittington CM, Griffith OW, Qi W, Thompson MB, Wilson AB. Seahorse brood pouch transcriptome reveals common genes associated with vertebrate pregnancy. *Molecular Biology and Evolution* 2015;32(12):3114–3131.
16. Longo SJ, Faircloth BC, Meyer A, Westneat MW, Alfaro ME, Wainwright PC. Phylogenomic analysis of a rapid radiation of misfit fishes (*Syngnathiformes*) using ultraconserved elements. *Molecular phylogenetics and evolution* 2017;113:33–48.
17. Whittington CM, Friesen CR. The evolution and physiology of male pregnancy in syngnathid fishes. *Biological Reviews* 2020;95(5):1252–1272.
18. Ranallo-Benavidez TR, Jaron KS, Schatz MC. GenomeScope 2.0 and Smudgeplot for reference-free profiling of polyploid genomes. *Nature communications* 2020;11(1):1–10.
19. Nurk S, Walenz BP, Rhie A, Vollger MR, Logsdon GA, Grothe R, et al. HiCanu: accurate assembly of segmental duplications, satellites, and allelic variants from high-fidelity long reads. *Genome research* 2020;30(9):1291–1305.
20. Bolger AM, Lohse M, Usadel B. Trimmomatic: a flexible trimmer for Illumina sequence data. *Bioinformatics* 2014;30(15):2114–2120.
21. Cheng H, Concepcion GT, Feng X, Zhang H, Li H. Haplotype-resolved de novo assembly using phased assembly graphs with hifiasm. *Nature methods* 2021;18(2):170–175.
22. Durand NC, Shamim MS, Machol I, Rao SS, Huntley MH, Lander ES, et al. Juicer provides a one-click system for analyzing loop-resolution Hi-C experiments. *Cell systems* 2016;3(1):95–98.
23. Roth O, Solbakken MH, Tørresen OK, Bayer T, Matschiner M, Baalsrud HT, et al. Evolution of male pregnancy associated with remodeling of canonical vertebrate immunity in seahorses and pipefishes. *Proceedings of the National Academy of Sciences* 2020;117(17):9431–9439.
24. Seppy M, Manni M, Zdobnov EM. BUSCO: assessing genome assembly and annotation completeness. In: *Gene prediction Springer*; 2019. p. 227–245.
25. Rhie A, Walenz BP, Koren S, Phillippy AM. Merqury: reference-free quality, completeness, and phasing assessment for genome assemblies. *Genome biology* 2020;21(1):1–27.
26. Gurevich A, Saveliev V, Vyahhi N, Tesler G. QUAST: quality assessment tool for genome assemblies. *Bioinformatics* 2013;29(8):1072–1075.
27. Vitturi R, Libertini A, Campolmi M, Calderazzo F, Mazzola A. Conventional karyotype, nucleolar organizer regions and genome size in five Mediterranean species of Syngnathidae (Pisces, Syngnathiformes). *Journal of Fish Biology* 1998;52(4):677–687.

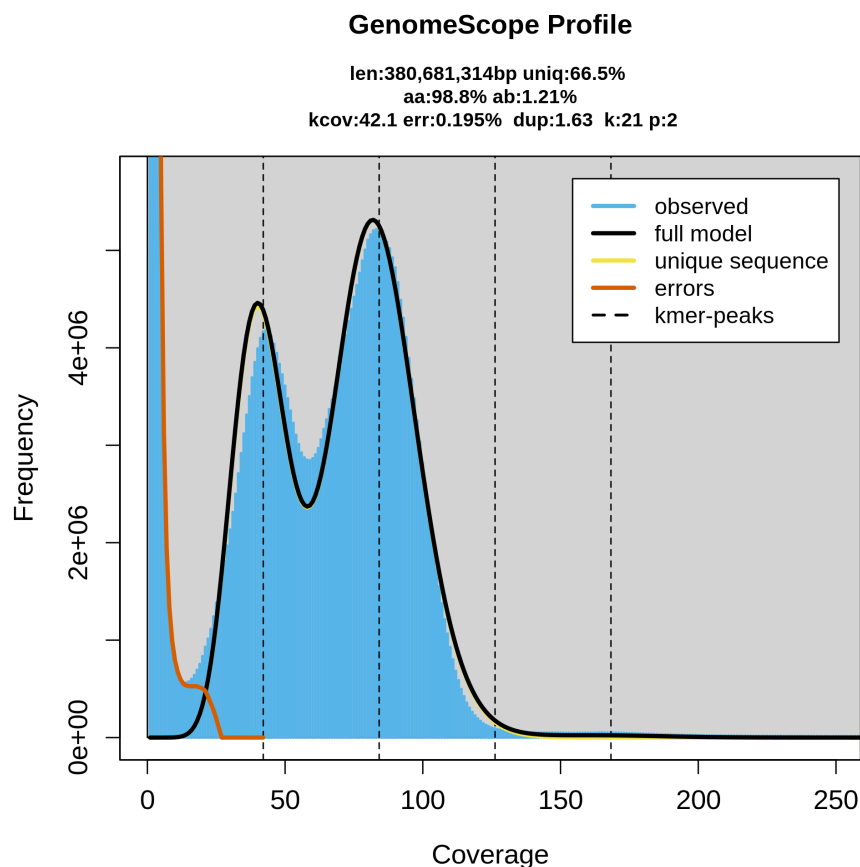

**Figure S1.** Genome Profile of *Syngnathus scovelli* based on Hi-Fi sequences using meryl and genomescope2 with k=21. The estimated genome size is around 380 Mb.

**Table S1.** Contiguity metrics from QUASt for the first pass and the scaffolded assembly of *S.scovelli\_v2* is summarized.

| Metrics                   | Haplotype1  | Haplotype2  | Primary Consensus Assembly | Scaffolded Assembly |
|---------------------------|-------------|-------------|----------------------------|---------------------|
| Number of contigs         | 901         | 544         | 585                        | 526                 |
| Largest contig            | 21,671,036  | 23,661,123  | 30,098,933                 | 30,098,933          |
| Total length              | 427,545,154 | 428,155,884 | 431,749,582                | 431,750,762         |
| GC (%)                    | 44.99       | 44.78       | 45.00                      | 45.00               |
| N50                       | 10,825,652  | 10,535,849  | 15,551,623                 | 17,337,441          |
| N75                       | 4,999,310   | 4,477,557   | 11,049,644                 | 13,347,818          |
| L50                       | 15          | 15          | 11                         | 10                  |
| L75                       | 29          | 30          | 19                         | 17                  |
| Number of N's per 100 kbp | 0.00        | 0.00        | 0.00                       | 0.27                |

**Table S2.** k-mer based assembly evaluation for completeness using Merqury

| Assembly             | k-mer set used | solid k-mers in the assembly | Total solid k-mers in the read set | Completeness (%) |
|----------------------|----------------|------------------------------|------------------------------------|------------------|
| <i>S.scovelli_v2</i> | all            | 272,969,166                  | 318,487,563                        | 85.708           |

**Table S3.** k-mer based quality evaluation using Merqury

| Assembly             | k-mers uniquely found only in the assembly | k-mers found in both assembly and the read set | QV      | Error rate  |
|----------------------|--------------------------------------------|------------------------------------------------|---------|-------------|
| <i>S.scovelli_v2</i> | 6,614                                      | 431,737,882                                    | 61.3697 | 7.29504e-07 |

**Table S4.** Gene and Feature Statistics from NCBI Eukaryotic Pipeline

| Feature                                      | S.scovelli_v2 |
|----------------------------------------------|---------------|
| Genes and pseudogenes                        | 29,062        |
| protein-coding                               | 20,101        |
| non-coding                                   | 8,061         |
| Transcribed pseudogenes                      | 0             |
| Non-transcribed pseudogenes                  | 887           |
| genes with variants                          | 10,398        |
| Immunoglobulin/T-cell receptor gene segments | 9             |
| other                                        | 4             |
| mRNAs                                        | 47,846        |
| fully-supported                              | 47,491        |
| with 5% ab initio                            | 89            |
| partial                                      | 39            |
| with filled gap(s)                           | 0             |
| known RefSeq                                 | 0             |
| model RefSeq                                 | 47,846        |
| non-coding RNAs                              | 12,092        |
| fully-supported                              | 7,318         |
| with 5% ab initio                            | 0             |
| partial                                      | 5             |
| with filled gap(s)                           | 0             |
| known RefSeq                                 | 0             |
| model RefSeq                                 | 10,741        |
| pseudo transcripts                           | 0             |
| fully-supported                              | 0             |
| with 5% ab initio                            | 0             |
| partial                                      | 0             |
| with filled gap(s)                           | 0             |
| known RefSeq                                 | 0             |
| model RefSeq                                 | 0             |
| CDSs                                         | 47,855        |
| fully-supported                              | 47,491        |
| with 5% ab initio                            | 115           |
| partial                                      | 39            |
| with major correction(s)                     | 144           |
| known RefSeq                                 | 0             |
| model RefSeq                                 | 47,846        |

**Table S5.** Detailed Feature Lengths from NCBI Eukaryotic Pipeline

| Feature         | Count   | Mean length (bp) | Median length (bp) | Min length (bp) | Max length (bp) |
|-----------------|---------|------------------|--------------------|-----------------|-----------------|
| Genes           | 28,166  | 11,149           | 4,361              | 56              | 677,970         |
| All transcripts | 59,938  | 3,654            | 2,773              | 56              | 106,526         |
| mRNA            | 47,846  | 3,907            | 3,042              | 204             | 98,797          |
| miscRNA         | 2,018   | 3,844            | 2,824              | 138             | 22,974          |
| tRNA            | 1,351   | 74               | 73                 | 71              | 87              |
| lncRNA          | 5,304   | 3,880            | 1,632              | 112             | 106,526         |
| snoRNA          | 117     | 123              | 126                | 62              | 319             |
| snRNA           | 378     | 142              | 141                | 56              | 196             |
| rRNA            | 2,920   | 1,228            | 154                | 118             | 4,380           |
| Single-exon     | 514     | 2,381            | 1,944              | 358             | 21,617          |
| coding          | 514     | 2,381            | 1,944              | 358             | 21,617          |
| CDSs            | 47,846  | 2,373            | 1,617              | 96              | 97,746          |
| Exons           | 277,161 | 325              | 142                | 2               | 38,823          |
| coding          | 260,368 | 299              | 140                | 2               | 38,823          |
| non-coding      | 27,774  | 515              | 152                | 9               | 36,521          |
| Introns         | 247,597 | 1,355            | 160                | 30              | 611,280         |
| coding          | 235,861 | 1,207            | 152                | 30              | 611,280         |
| non-coding      | 22,579  | 2,911            | 304                | 30              | 498,241         |

Table S6: List of BUSCO IDS missing from odb10 in Syngnathidae

| S.No | Missing in <i>Syngnathus</i> genus | Missing in <i>Hippocampus</i> genus | Common among the two genera ( <i>Syngnathus</i> and <i>Hippocampus</i> ) |
|------|------------------------------------|-------------------------------------|--------------------------------------------------------------------------|
| 1    | 57763at7898                        | 67882at7898                         | 55833at789                                                               |
| 2    | 113518at7898                       | 131304at7898                        | 58251at789                                                               |
| 3    | 70475at7898                        | 65212at7898                         | 129524at789                                                              |
| 4    | 11981at7898                        | 39050at7898                         | 30261at789                                                               |
| 5    | 35030at7898                        | 55416at7898                         | 69518at789                                                               |
| 6    | 55416at7898                        | 38468at7898                         | 42298at789                                                               |
| 7    | 80648at7898                        | 37804at7898                         | 92290at789                                                               |
| 8    | 55833at7898                        | 58251at7898                         | 78658at789                                                               |
| 9    | 15950at7898                        | 43179at7898                         | 50407at789                                                               |
| 10   | 92290at7898                        | 130413at7898                        | 65212at789                                                               |
| 11   | 75447at7898                        | 88107at7898                         | 106707at789                                                              |
| 12   | 131401at7898                       | 106707at7898                        | 88107at789                                                               |
| 13   | 73791at7898                        | 55833at7898                         | 59480at789                                                               |
| 14   | 59450at7898                        | 129524at7898                        | 43179at789                                                               |
| 15   | 65007at7898                        | 107354at7898                        | 37804at789                                                               |
| 16   | 134401at7898                       | 88998at7898                         | 53002at789                                                               |
| 17   | 85487at7898                        | 75955at7898                         | 103414at789                                                              |
| 18   | 43533at7898                        | 87291at7898                         | 134401at789                                                              |
| 19   | 1155at7898                         | 107825at7898                        | 88998at789                                                               |
| 20   | 75955at7898                        | 1155at7898                          | 131304at789                                                              |
| 21   | 30911at7898                        | 102349at7898                        | 104401at789                                                              |
| 22   | 42232at7898                        | 59450at7898                         | 10242at789                                                               |
| 23   | 71271at7898                        | 8271at7898                          | 38468at789                                                               |
| 24   | 27668at7898                        | 121548at7898                        | 67882at789                                                               |
| 25   | 10143at7898                        | 53002at7898                         | 10143at789                                                               |
| 26   | 52590at7898                        | 134401at7898                        | 102349at789                                                              |
| 27   | 86250at7898                        | 69518at7898                         | 21496at789                                                               |
| 28   | 42298at7898                        | 116at7898                           | 107825at789                                                              |
| 29   | 118274at7898                       | 29564at7898                         | 9176at789                                                                |
| 30   | 58251at7898                        | 42298at7898                         | 59450at789                                                               |
| 31   | 85116at7898                        | 10143at7898                         | 1155at789                                                                |
| 32   | 43649at7898                        | 92290at7898                         | 75955at789                                                               |
| 33   | 106801at7898                       | 50407at7898                         | 130413at789                                                              |
| 34   | 82299at7898                        | 103414at7898                        | 57763at789                                                               |
| 35   | 69518at7898                        | 104401at7898                        | 29564at789                                                               |
| 36   | 103414at7898                       | 9176at7898                          | 55416at789                                                               |
| 37   | 129524at7898                       | 30261at7898                         | 92234at789                                                               |
| 38   | 110670at7898                       | 59480at7898                         | 93458at789                                                               |
| 39   | 59480at7898                        | 57763at7898                         |                                                                          |
| 40   | 83539at7898                        | 93458at7898                         |                                                                          |
| 41   | 130413at7898                       | 102866at7898                        |                                                                          |
| 42   | 43179at7898                        | 78658at7898                         |                                                                          |
| 43   | 47247at7898                        | 10242at7898                         |                                                                          |
| 44   | 102349at7898                       | 92234at7898                         |                                                                          |
| 45   | 38468at7898                        | 21496at7898                         |                                                                          |

Continued on next page



Table S6: List of BUSCO IDS missing from odb10 in Syngnathidae (Continued)

| S.No | Missing in <i>Syngnathus</i> genus | Missing in <i>Hippocampus</i> genus | Common among the two genera ( <i>Syngnathus</i> and <i>Hippocampus</i> ) |
|------|------------------------------------|-------------------------------------|--------------------------------------------------------------------------|
| 46   | 88998at7898                        |                                     |                                                                          |
| 47   | 106707at7898                       |                                     |                                                                          |
| 48   | 92234at7898                        |                                     |                                                                          |
| 49   | 51064at7898                        |                                     |                                                                          |
| 50   | 43538at7898                        |                                     |                                                                          |
| 51   | 111533at7898                       |                                     |                                                                          |
| 52   | 107825at7898                       |                                     |                                                                          |
| 53   | 9176at7898                         |                                     |                                                                          |
| 54   | 14734at7898                        |                                     |                                                                          |
| 55   | 15828at7898                        |                                     |                                                                          |
| 56   | 10242at7898                        |                                     |                                                                          |
| 57   | 78658at7898                        |                                     |                                                                          |
| 58   | 93458at7898                        |                                     |                                                                          |
| 59   | 109207at7898                       |                                     |                                                                          |
| 60   | 69656at7898                        |                                     |                                                                          |
| 61   | 56979at7898                        |                                     |                                                                          |
| 62   | 104401at7898                       |                                     |                                                                          |
| 63   | 79338at7898                        |                                     |                                                                          |
| 64   | 88107at7898                        |                                     |                                                                          |
| 65   | 97002at7898                        |                                     |                                                                          |
| 66   | 122116at7898                       |                                     |                                                                          |
| 67   | 60389at7898                        |                                     |                                                                          |
| 68   | 116288at7898                       |                                     |                                                                          |
| 69   | 131304at7898                       |                                     |                                                                          |
| 70   | 67882at7898                        |                                     |                                                                          |
| 71   | 70206at7898                        |                                     |                                                                          |
| 72   | 65212at7898                        |                                     |                                                                          |
| 73   | 91225at7898                        |                                     |                                                                          |
| 74   | 50407at7898                        |                                     |                                                                          |
| 75   | 53002at7898                        |                                     |                                                                          |
| 76   | 84014at7898                        |                                     |                                                                          |
| 77   | 30261at7898                        |                                     |                                                                          |
| 78   | 37804at7898                        |                                     |                                                                          |
| 79   | 29564at7898                        |                                     |                                                                          |
| 80   | 7429at7898                         |                                     |                                                                          |
| 81   | 21496at7898                        |                                     |                                                                          |
| 82   | 44544at7898                        |                                     |                                                                          |
| 83   | 4528at7898                         |                                     |                                                                          |

The *Syngnathus* genus in this table includes *S. acus*, *S. rostellatus*, *S. typhle*, and *S. floridae* and the *Hippocampus* genus includes *H.comes*, *H.abdominalis*, *Herectus*, *H.kuda*, *H.whitei*, and *H.zosteriae*

**Table S7.** Sequence Identifiers for Chromosome Level Scaffolds

---

| Sequence Identifier |
|---------------------|
| NW_026061189.1      |
| NW_026061295.1      |
| NW_026061314.1      |
| NW_026061274.1      |
| NW_026061284.1      |
| NW_026061305.1      |
| NW_026061253.1      |
| NW_026061242.1      |
| NW_026061496.1      |
| NW_026061652.1      |
| NW_026061232.1      |
| NW_026061263.1      |
| NW_026061190.1      |
| NW_026061674.1      |
| NW_026061221.1      |
| NW_026061211.1      |
| NW_026061391.1      |
| NW_026061296.1      |
| NW_026061200.1      |
| NW_026061641.1      |
| NW_026061603.1      |
| NW_026061663.1      |

---
